# Supplementary material for: A transcription factor-based framework for monitoring stress status in oysters: applications in conservation and restoration Running title: Transcription factors-based monitoring of oyster health
Source: Research Square preprint supplement (doi:10.21203/rs.3.rs-7153982/v1), 2025-07-23
Supplement: Supplementary file 1 [file daf8007a24628de86ab21c74.docx]

**Supporting Information for**

**A transcription factor-based framework for monitoring stress status in oysters: applications in conservation and restoration**

Shen-Tong Wang b,c,e, Li Li a,b,c,e,f*, Qi Yang c, Wei Wang b,c,e, Ao Li a,c,d,e, Xinxing Wang c, Yu Wang g, Guo-Fan Zhang a,c,d,e,f

*Corresponding authors:

*Li Li, Laboratory of Experimental Marine Biology, Institute of Oceanology, Chinese Academy of Sciences, Qingdao, Shandong, China.

Email address: [lili@qdio.ac.cn](mailto:lili@qdio.ac.cn)

Phone number: 13969696697

Number of pages: 18

Number of tables: 9

Number of figures: 9

**Table S1. Number of samples per group used in enzyme activity, RNA-seq and ATAC-seq and gene expression analyses.**

|  | Enzyme  activity | RNA-seq | ATAC-seq | Gene expression |  |
| --- | --- | --- | --- | --- | --- |
| Number of individuals analyzed at each tidal level | 15 | 15 | 15 | 9 |  |
| Number of individuals combined to one biological replicate | 3 | 3 | 5 | 3 |  |
| Number of biological replicates analyzed at each tidal level | 5 | 5 | 3 | 3 |  |

**Table S2. Latitude and longitude of sampling stations in the DaShentang Reserve**

| Station | Longitude (E) | Latitude (N) | Depth (m) |
| --- | --- | --- | --- |
| A1 | 117.96948 | 39.12010 | 7.4 |
| A2 | 117.98950 | 39.12200 | 5.7 |
| A3 | 117.98080 | 39.11410 | 7.7 |
| A4 | 117.97027 | 39.10538 | 5.8 |
| A5 | 117.98607 | 39.10193 | 6.1 |

**Table S3. Primer sequences used in the study**

| Gene | Forward (5’-3’) | Reverse (5’-3’) |
| --- | --- | --- |
| *BORIS* | CATGCCTCAAGATGGAAGCC | TTCCTCCACCGCATCTTTCT |
| *MYB73* | AAGTTTTCCGCTGTTCCGTC | CTACGATGTCTTTGGGCTGC |
| *Ef-1α* | AAGGGATGGTCCGTTGAG | GTGGAAGACGAAGAGGTAAGT |
| *BORIS_2071* | GGUCAUUGUUGCAAAUAAACU | UUUAUUUGCAACAAUGACCUC |
| *MYB73_246* | GGUGGUGUAAAGUACUCAACC | UUGAGUACUUUACACCACCUG |

**Table S4. Seawater temperature at different tide levels**

|  | Mean (°C) | SD (°C) | CV (%） | Median (°C) |
| --- | --- | --- | --- | --- |
| HT | 20.37 | 8.34 | 40.94% | 21.86 |
| MT | 19.55 | 6.94 | 35.52% | 21.47 |
| LT | 19.09 | 6.26 | 32.72% | 21.22 |

note: HT: high tide; MT: middle tide; LT: low tide; SD: standard deviation; CV: coefficient of variation.

**Table S5. The quality of reads in RNA-seq**

| Sample | Total raw read (M) | Total clean read (M) | Total clean base (G) | Clean read Q20 (%) | Clean read Q30 (%) | Clean read ratio (%) |
| --- | --- | --- | --- | --- | --- | --- |
| HT_1 | 40.78 | 40.29 | 5.99 | 96.99 | 91.66 | 98.79 |
| HT_2 | 42.02 | 41.57 | 6.19 | 97.13 | 91.9 | 98.93 |
| HT_3 | 40.78 | 40.34 | 6.00 | 97.28 | 92.30 | 98.91 |
| HT_4 | 40.35 | 39.90 | 5.93 | 97.47 | 92.63 | 98.89 |
| HT_5 | 40.78 | 40.35 | 6.00 | 97.29 | 92.29 | 98.94 |
| MT_1 | 42.38 | 41.85 | 6.22 | 96.71 | 91.13 | 98.75 |
| MT_2 | 41.32 | 40.89 | 6.08 | 97.35 | 92.41 | 98.95 |
| MT_3 | 43.85 | 43.28 | 6.42 | 96.86 | 91.40 | 98.70 |
| MT_4 | 42.32 | 41.84 | 6.22 | 97.21 | 92.15 | 98.87 |
| MT_5 | 40.84 | 40.35 | 6.00 | 96.96 | 91.59 | 98.79 |
| LT_1 | 40.47 | 39.97 | 5.94 | 97.19 | 92.11 | 98.77 |
| LT_2 | 40.22 | 39.79 | 5.91 | 97.16 | 92.01 | 98.94 |
| LT_3 | 41.84 | 41.39 | 6.15 | 97.10 | 91.87 | 98.93 |
| LT_4 | 42.71 | 42.26 | 6.27 | 97.19 | 92.09 | 98.94 |
| LT_5 | 48.15 | 47.59 | 7.08 | 97.14 | 91.98 | 98.85 |

note: HT: high tide; MT: middle tide; LT: low tide.

**Table S6. Mapped reads of RNA-sequencing data**

| Sample | Total clean reads (M) | Total mapping (%) | Uniquely mapping (%) | Multiple mapping (%) |
| --- | --- | --- | --- | --- |
| HT_1 | 40.29 | 70.93 | 66.40 | 4.53 |
| HT_2 | 41.57 | 72.45 | 68.01 | 4.44 |
| HT_3 | 40.34 | 72.38 | 67.26 | 5.12 |
| HT_4 | 39.90 | 72.58 | 68.00 | 4.58 |
| HT_5 | 40.35 | 72.87 | 67.59 | 5.28 |
| MT_1 | 41.85 | 71.94 | 66.65 | 5.29 |
| MT_2 | 40.89 | 71.88 | 66.81 | 5.07 |
| MT_3 | 43.28 | 71.47 | 66.46 | 5.01 |
| MT_4 | 41.84 | 71.35 | 65.98 | 5.37 |
| MT_5 | 40.35 | 72.56 | 67.89 | 4.67 |
| LT_1 | 39.97 | 72.57 | 67.72 | 4.85 |
| LT_2 | 39.79 | 72.86 | 67.60 | 5.26 |
| LT_3 | 41.39 | 72.03 | 65.93 | 6.10 |
| LT_4 | 42.26 | 72.65 | 67.40 | 5.25 |
| LT_5 | 47.59 | 72.27 | 67.12 | 5.15 |

note: HT: high tide; MT: middle tide; LT: low tide.

**Table S7. The quality of clean reads in ATAC-seq data**

| Sample | Clean reads (M) | Clean bases (G) | Clean Q20 (%) | Clean Q30 (%) | Clean GC (%) |
| --- | --- | --- | --- | --- | --- |
| HT_1 | 200721420 | 13.20 | 99.01 | 96.17 | 37.19 |
| HT_2 | 235460248 | 14.55 | 99.21 | 96.83 | 37.05 |
| HT_3 | 211927596 | 13.02 | 99.18 | 96.64 | 36.35 |
| LT_1 | 223482874 | 15.42 | 99.21 | 96.94 | 35.29 |
| LT_2 | 210319992 | 14.26 | 99.16 | 96.68 | 35.82 |
| LT_3 | 158884182 | 8.96 | 99.26 | 96.89 | 35.38 |

note: HT: high tide; MT: middle tide; LT: low tide.

**Table S8. Mapped reads of ATAC-seq data**

| Sample | Total reads (M) | Total mapped (%) | Non unique (%) | Unique  (%) | Un mapped reads (%) |
| --- | --- | --- | --- | --- | --- |
| HT_1 | 200721420 | 151282084  (75.37) | 89969549  (59.47) | 61312535  (40.53) | 49439336  (24.63) |
| HT_2 | 235460248 | 180692026  (76.74) | 105533549  (58.41) | 75158477  (41.59) | 54768222  (23.26) |
| HT_3 | 211927596 | 164182577  (77.47) | 97602320  (59.45) | 66580257  (40.55) | 47745019  (22.53) |
| LT_1 | 223482874 | 180336901  (80.69) | 108074292  (59.93) | 72262609  (40.07) | 43145973  (19.31) |
| LT_2 | 210319992 | 172105943(  81.83) | 98969177  (57.50) | 73136766  (42.50) | 38214049  (18.17) |
| LT_3 | 158884182 | 127577452  (80.30) | 75497142  (59.18) | 52080310  (40.82) | 31306730  (19.70) |

note: HT: high tide; MT: middle tide; LT: low tide.

**Table S9. Expression profiles of transcription factors (TFs) in oysters under high and low tidal levels**

| TFs | HT_vs_LT_Log2FC | HT_vs_LT_*p*-value | HT_vs_MT_Log2FC | HT_vs_MT_*p*-value |
| --- | --- | --- | --- | --- |
| *Fkh-9* | 1.051509 | 0.739378 | -1.942742 | 0.351065 |
| *Mab-3* | -0.000816 | 0.996244 | -0.269923 | 0.045096 |
| *MYB73* | 0.440652 | 0.008685 | 0.368217 | 0.009754 |
| *Dve* | 0.022904 | 0.858382 | 0.251030 | 0.029190 |
| *Mcm1* | 0.061039 | 0.614490 | 0.264610 | 0.033613 |
| *SOX-5* | 0.430940 | 0.002947 | 0.146433 | 0.287016 |
| *TOS8* | -0.040346 | 0.742557 | 0.051126 | 0.697045 |
| *RELB* | -0.254308 | 0.000131 | -0.205581 | 0.018959 |
| *MEF2B* | -0.003947 | 0.969402 | 0.014446 | 0.905795 |
| *USV1* | -0.182603 | 0.103883 | 0.023962 | 0.855376 |
| *NEUROD1* | -0.313530 | 0.674294 | -0.009990 | 0.989806 |
| *BORIS* | 0.633788 | 0.002956 | 0.808691 | 0.000381 |
| *PROX1* | 0.160519 | 0.275575 | -0.090066 | 0.383348 |
| *OVOL2* | -0.233008 | 0.473947 | -0.089443 | 0.763980 |
| *ZBTB32* | 2.177333 | 0.181193 | -0.267708 | 0.847989 |
| *Bcl11a* | 0.205108 | 0.096658 | 0.351970 | 0.012518 |
| *ZBTB26* | -0.097562 | 0.426531 | -0.016310 | 0.900486 |
| *Slbo* | -0.327214 | 0.176503 | -0.334930 | 0.236335 |

note: HT: high tide; MT: middle tide; LT: low tide; FC: foldchange


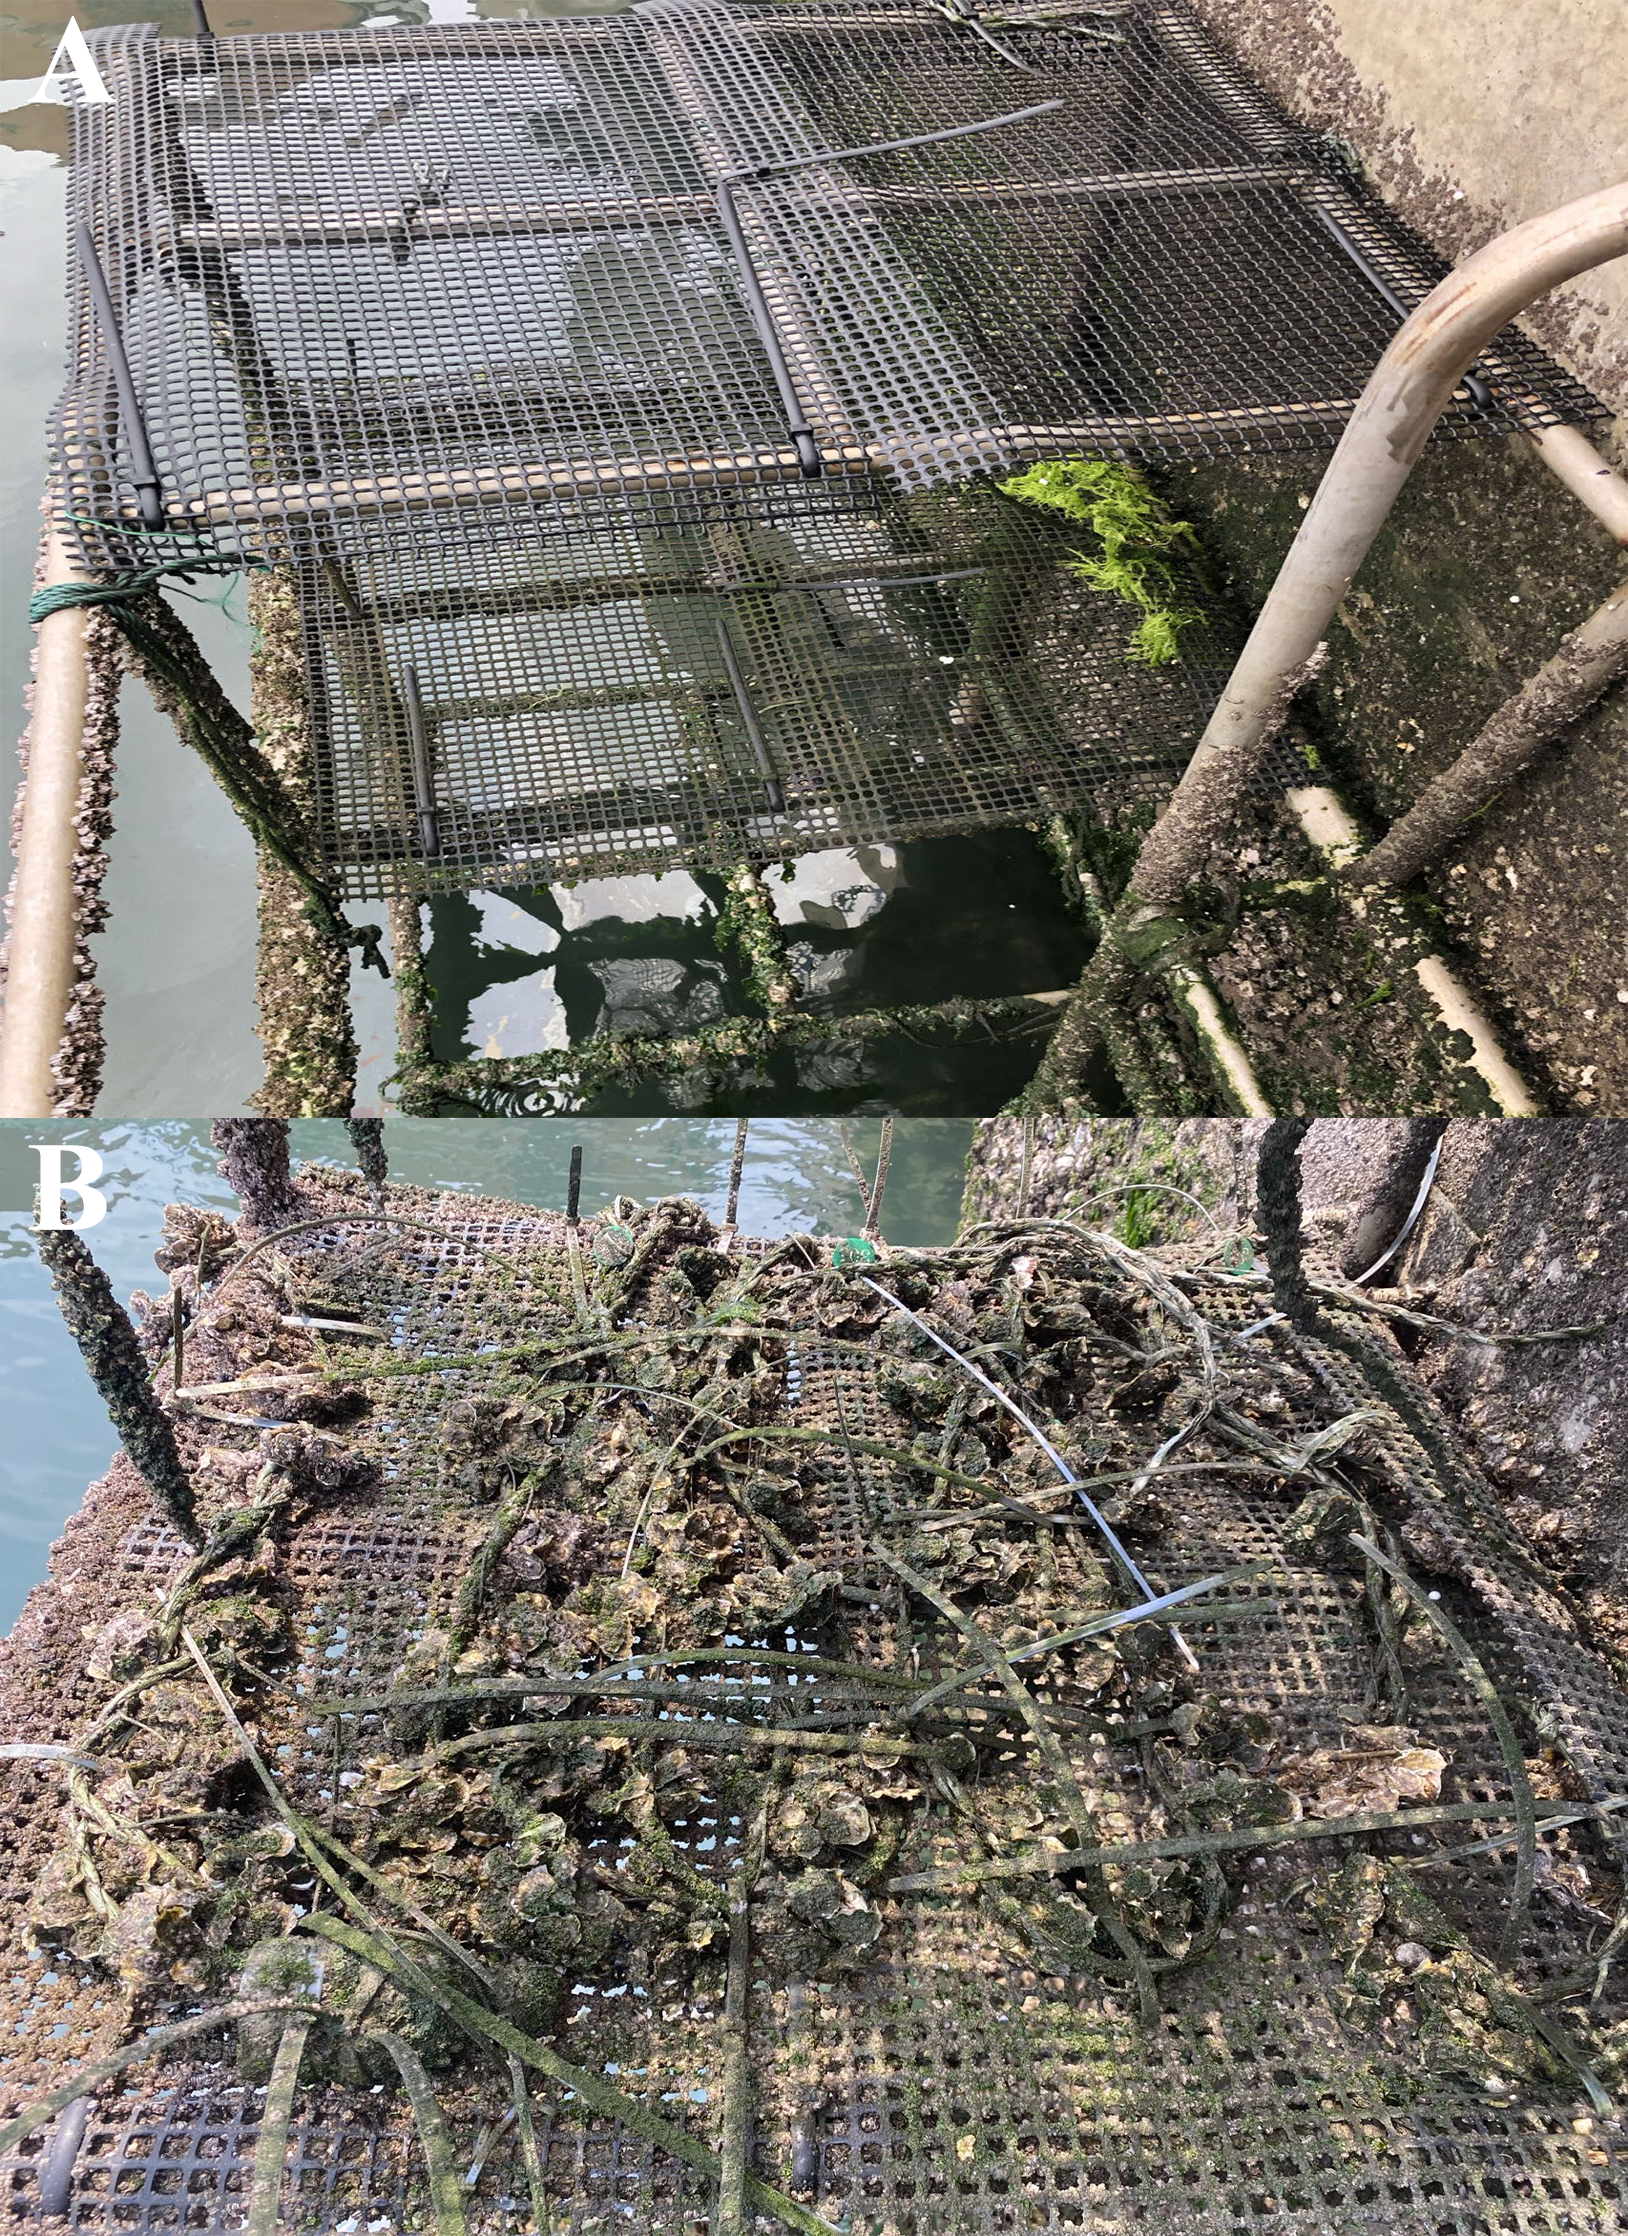


**Figure S1.** **Photographic records document the field experimental site showing (A) pre-deployment conditions and (B) post-deployment status of oyster specimens.**


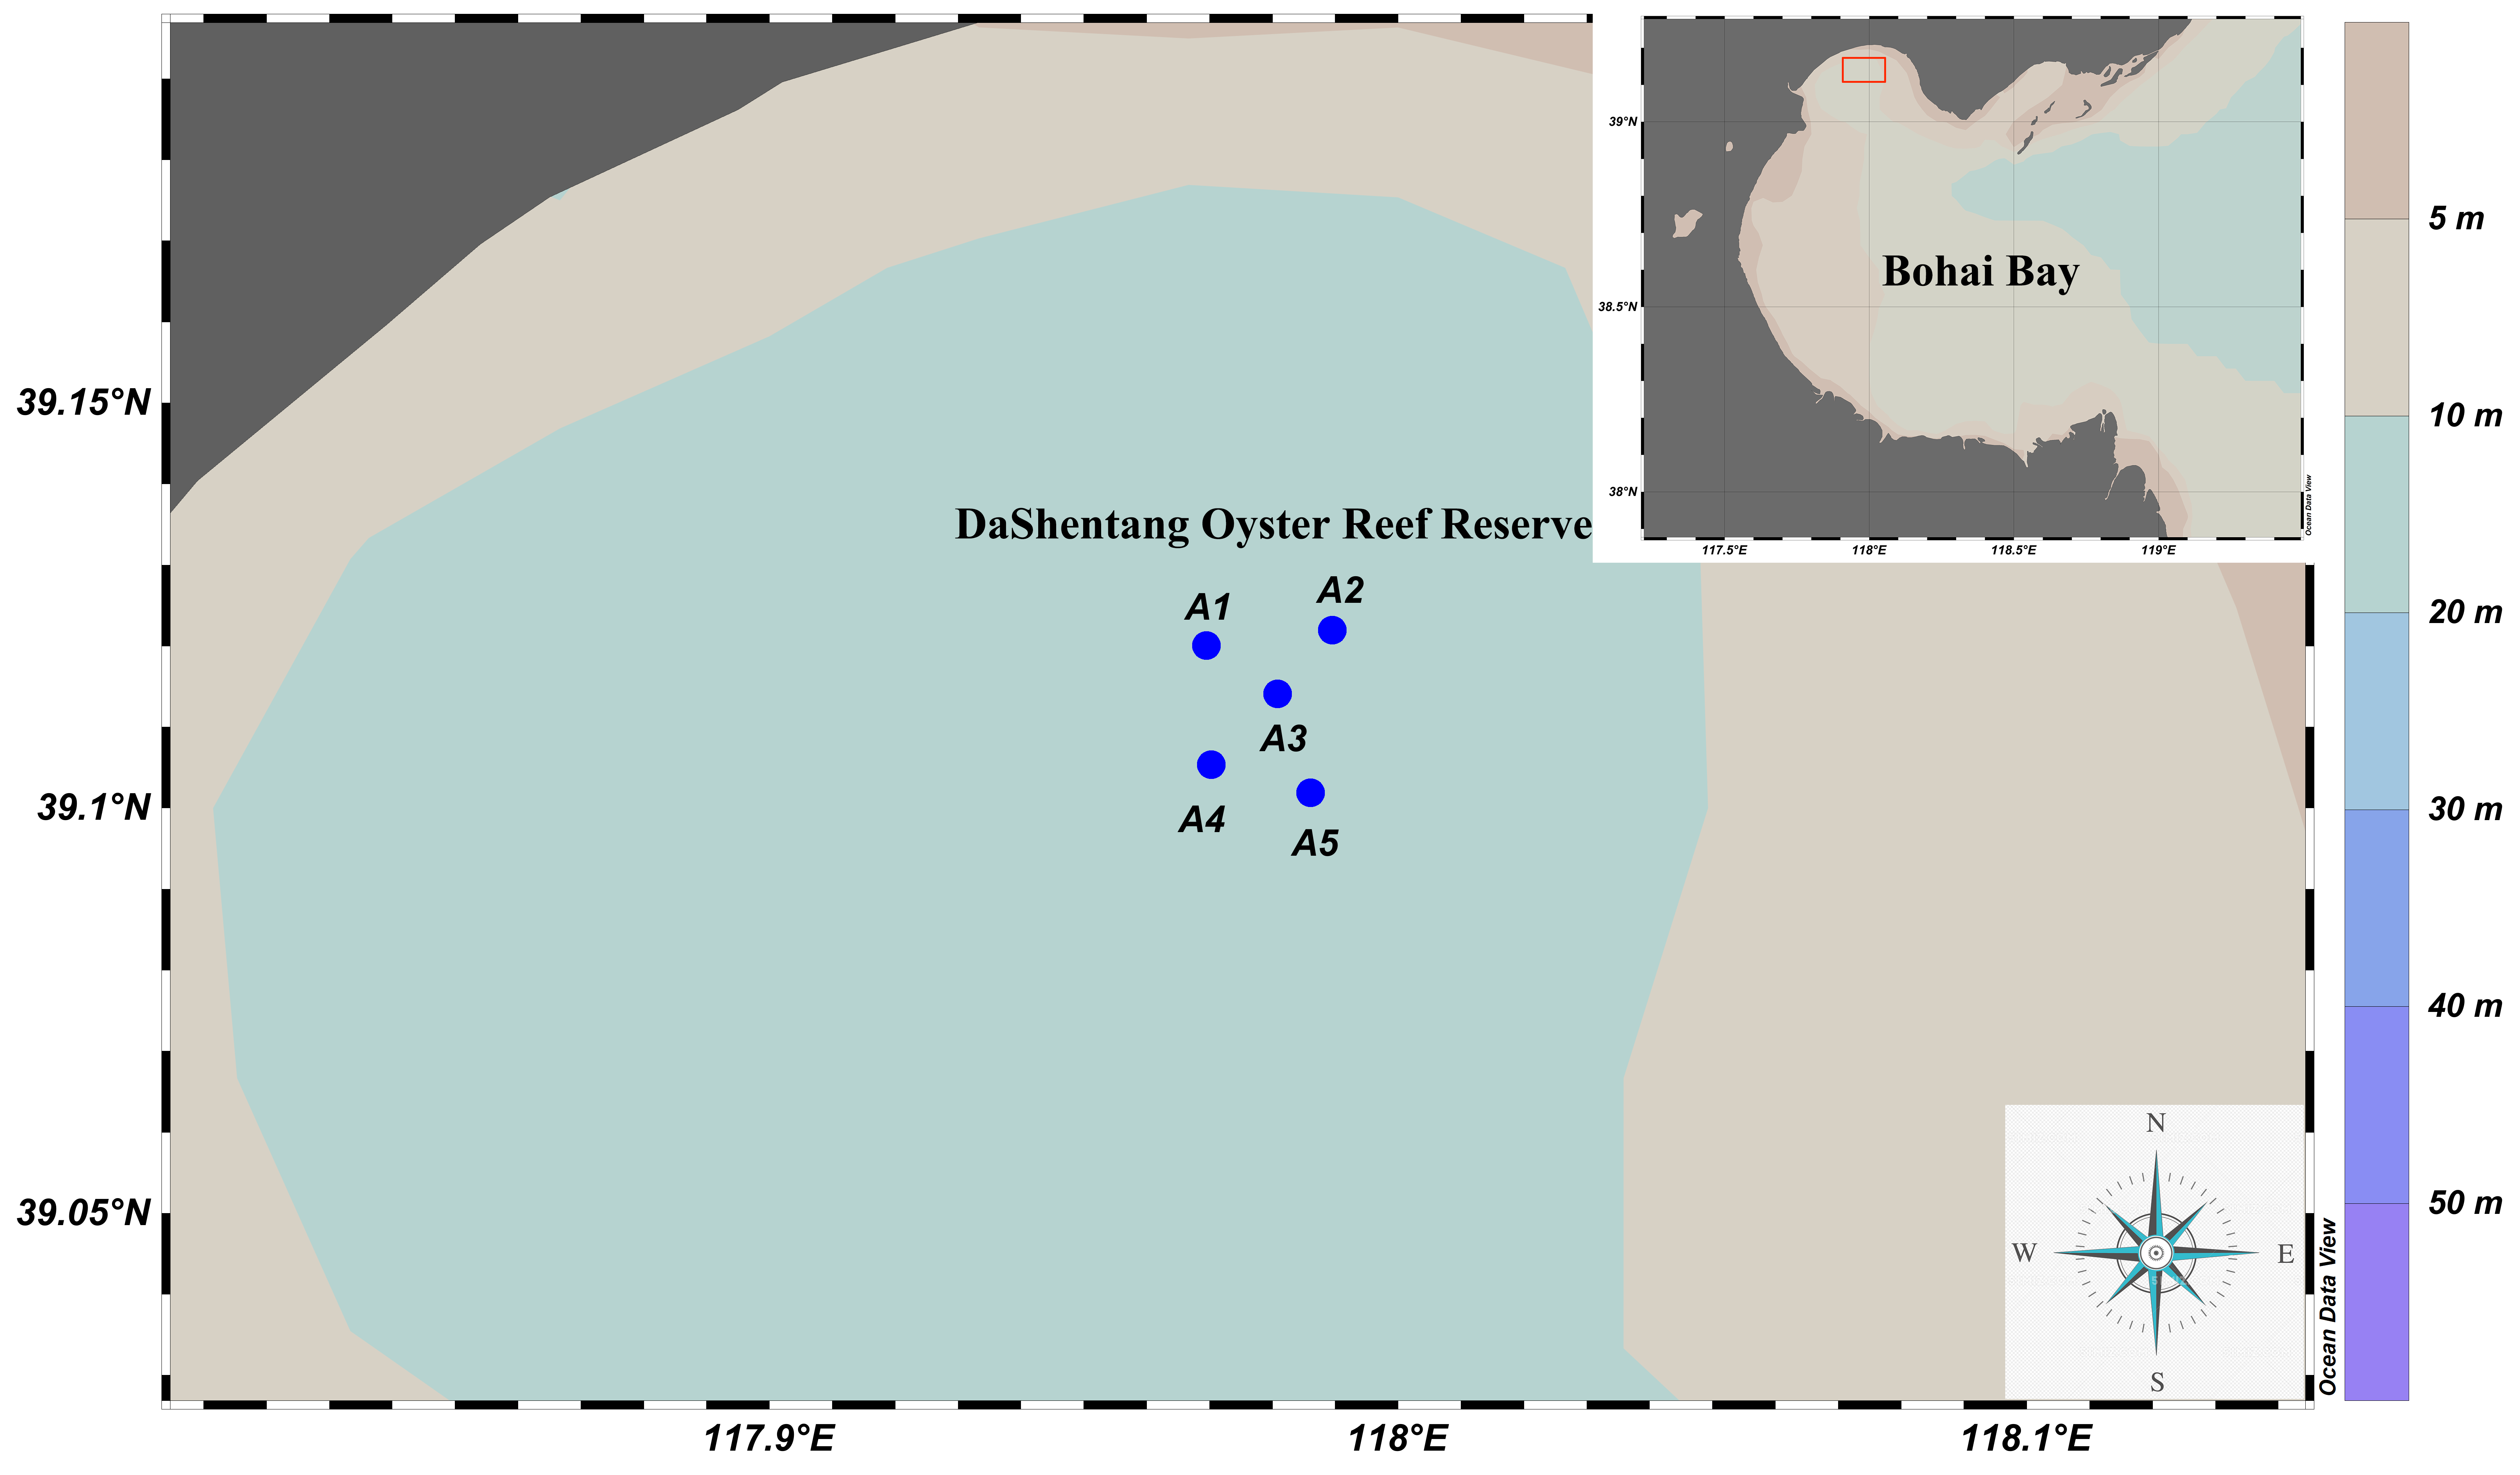


**Figure S2. Sampling sites for collecting the oysters from DaShentang Reserve (39.17824°N, 117.96467°E) on Bohai Bay, northern China.** Red rectangle represents DaShentang oyster reef reserve. The darker colors in the right column indicate greater depth.


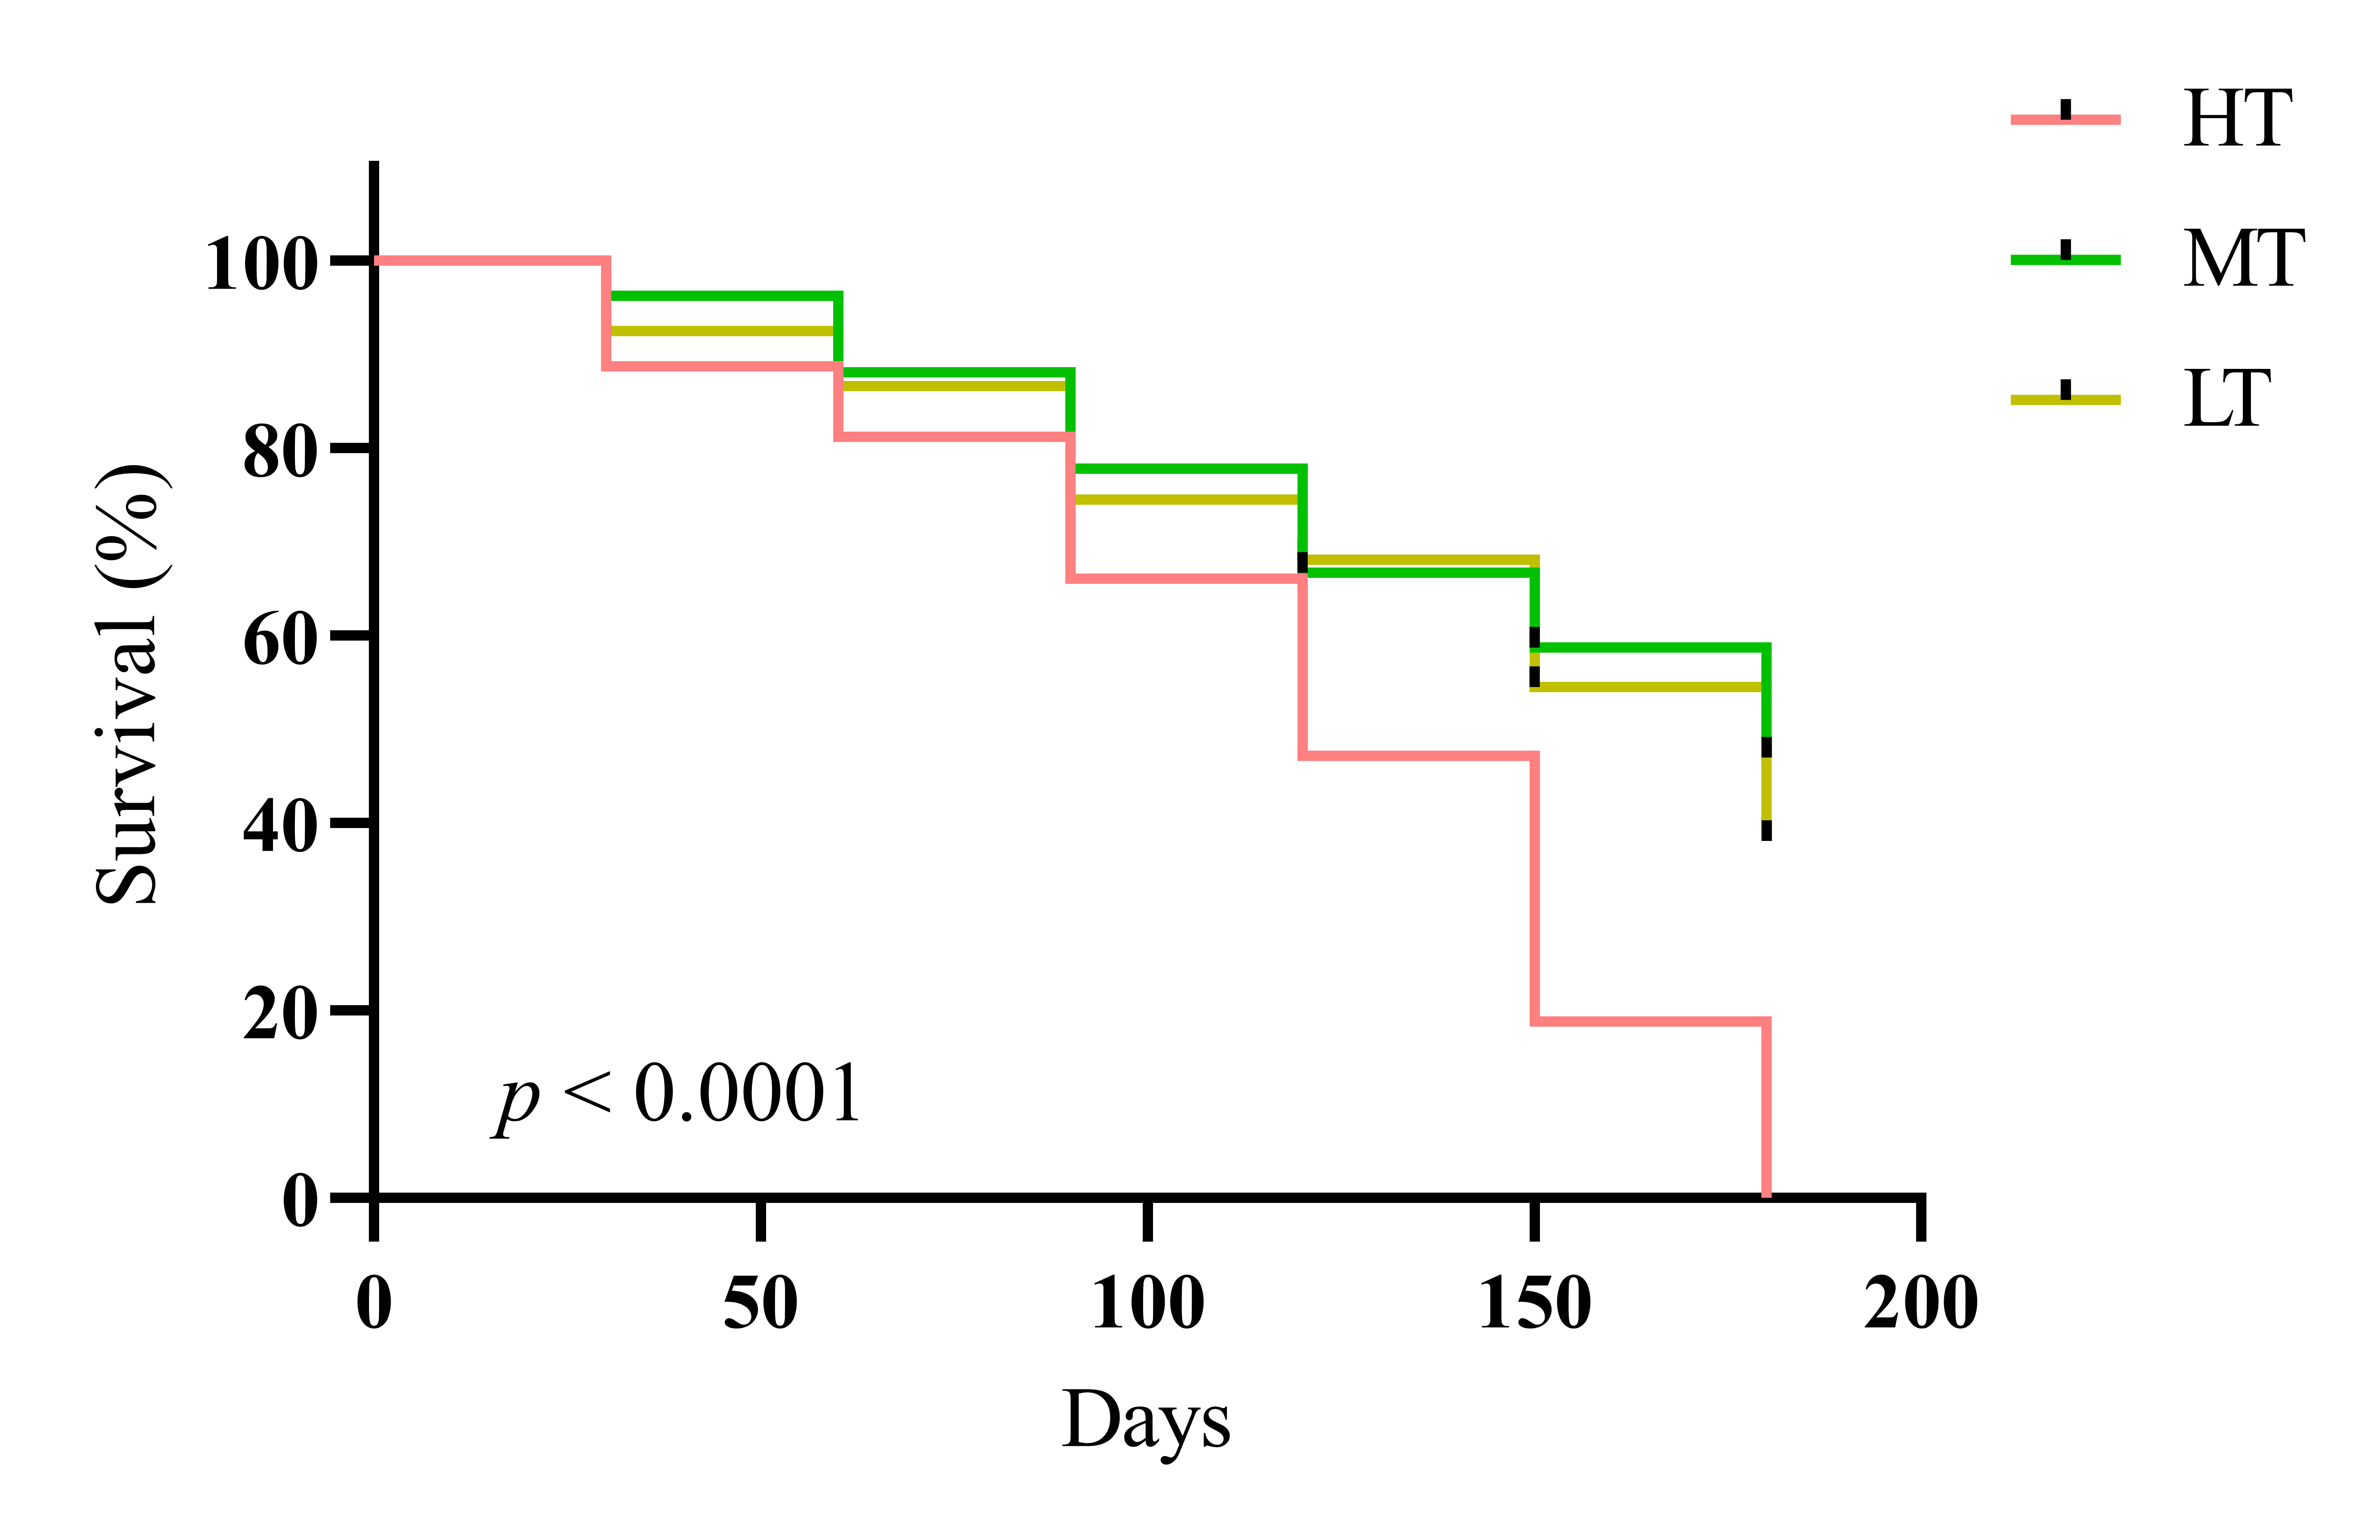


**Figure S3. The survival of oyster under high (HT), middle (MT), and low (LT) tidal levels during experimental period.**


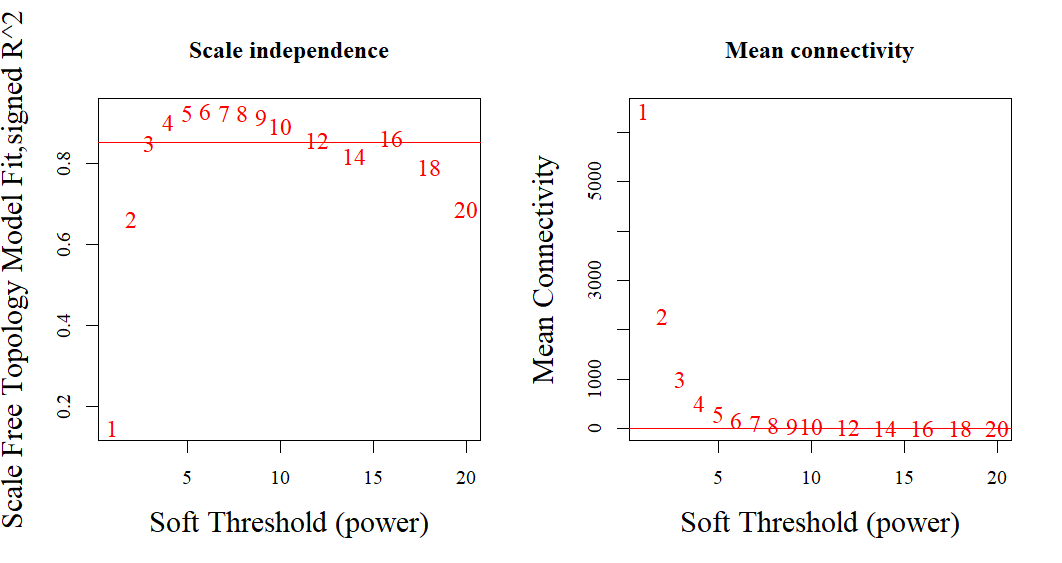
**Figure S4. The analysis of network topology for various soft thresholding.** As illustrated in the left panel, the scale-free topology model fit is demonstrated as a function of the soft-thresholding. The right panel provides a visual representation of the mean connectivity as a function of the soft thresholding.


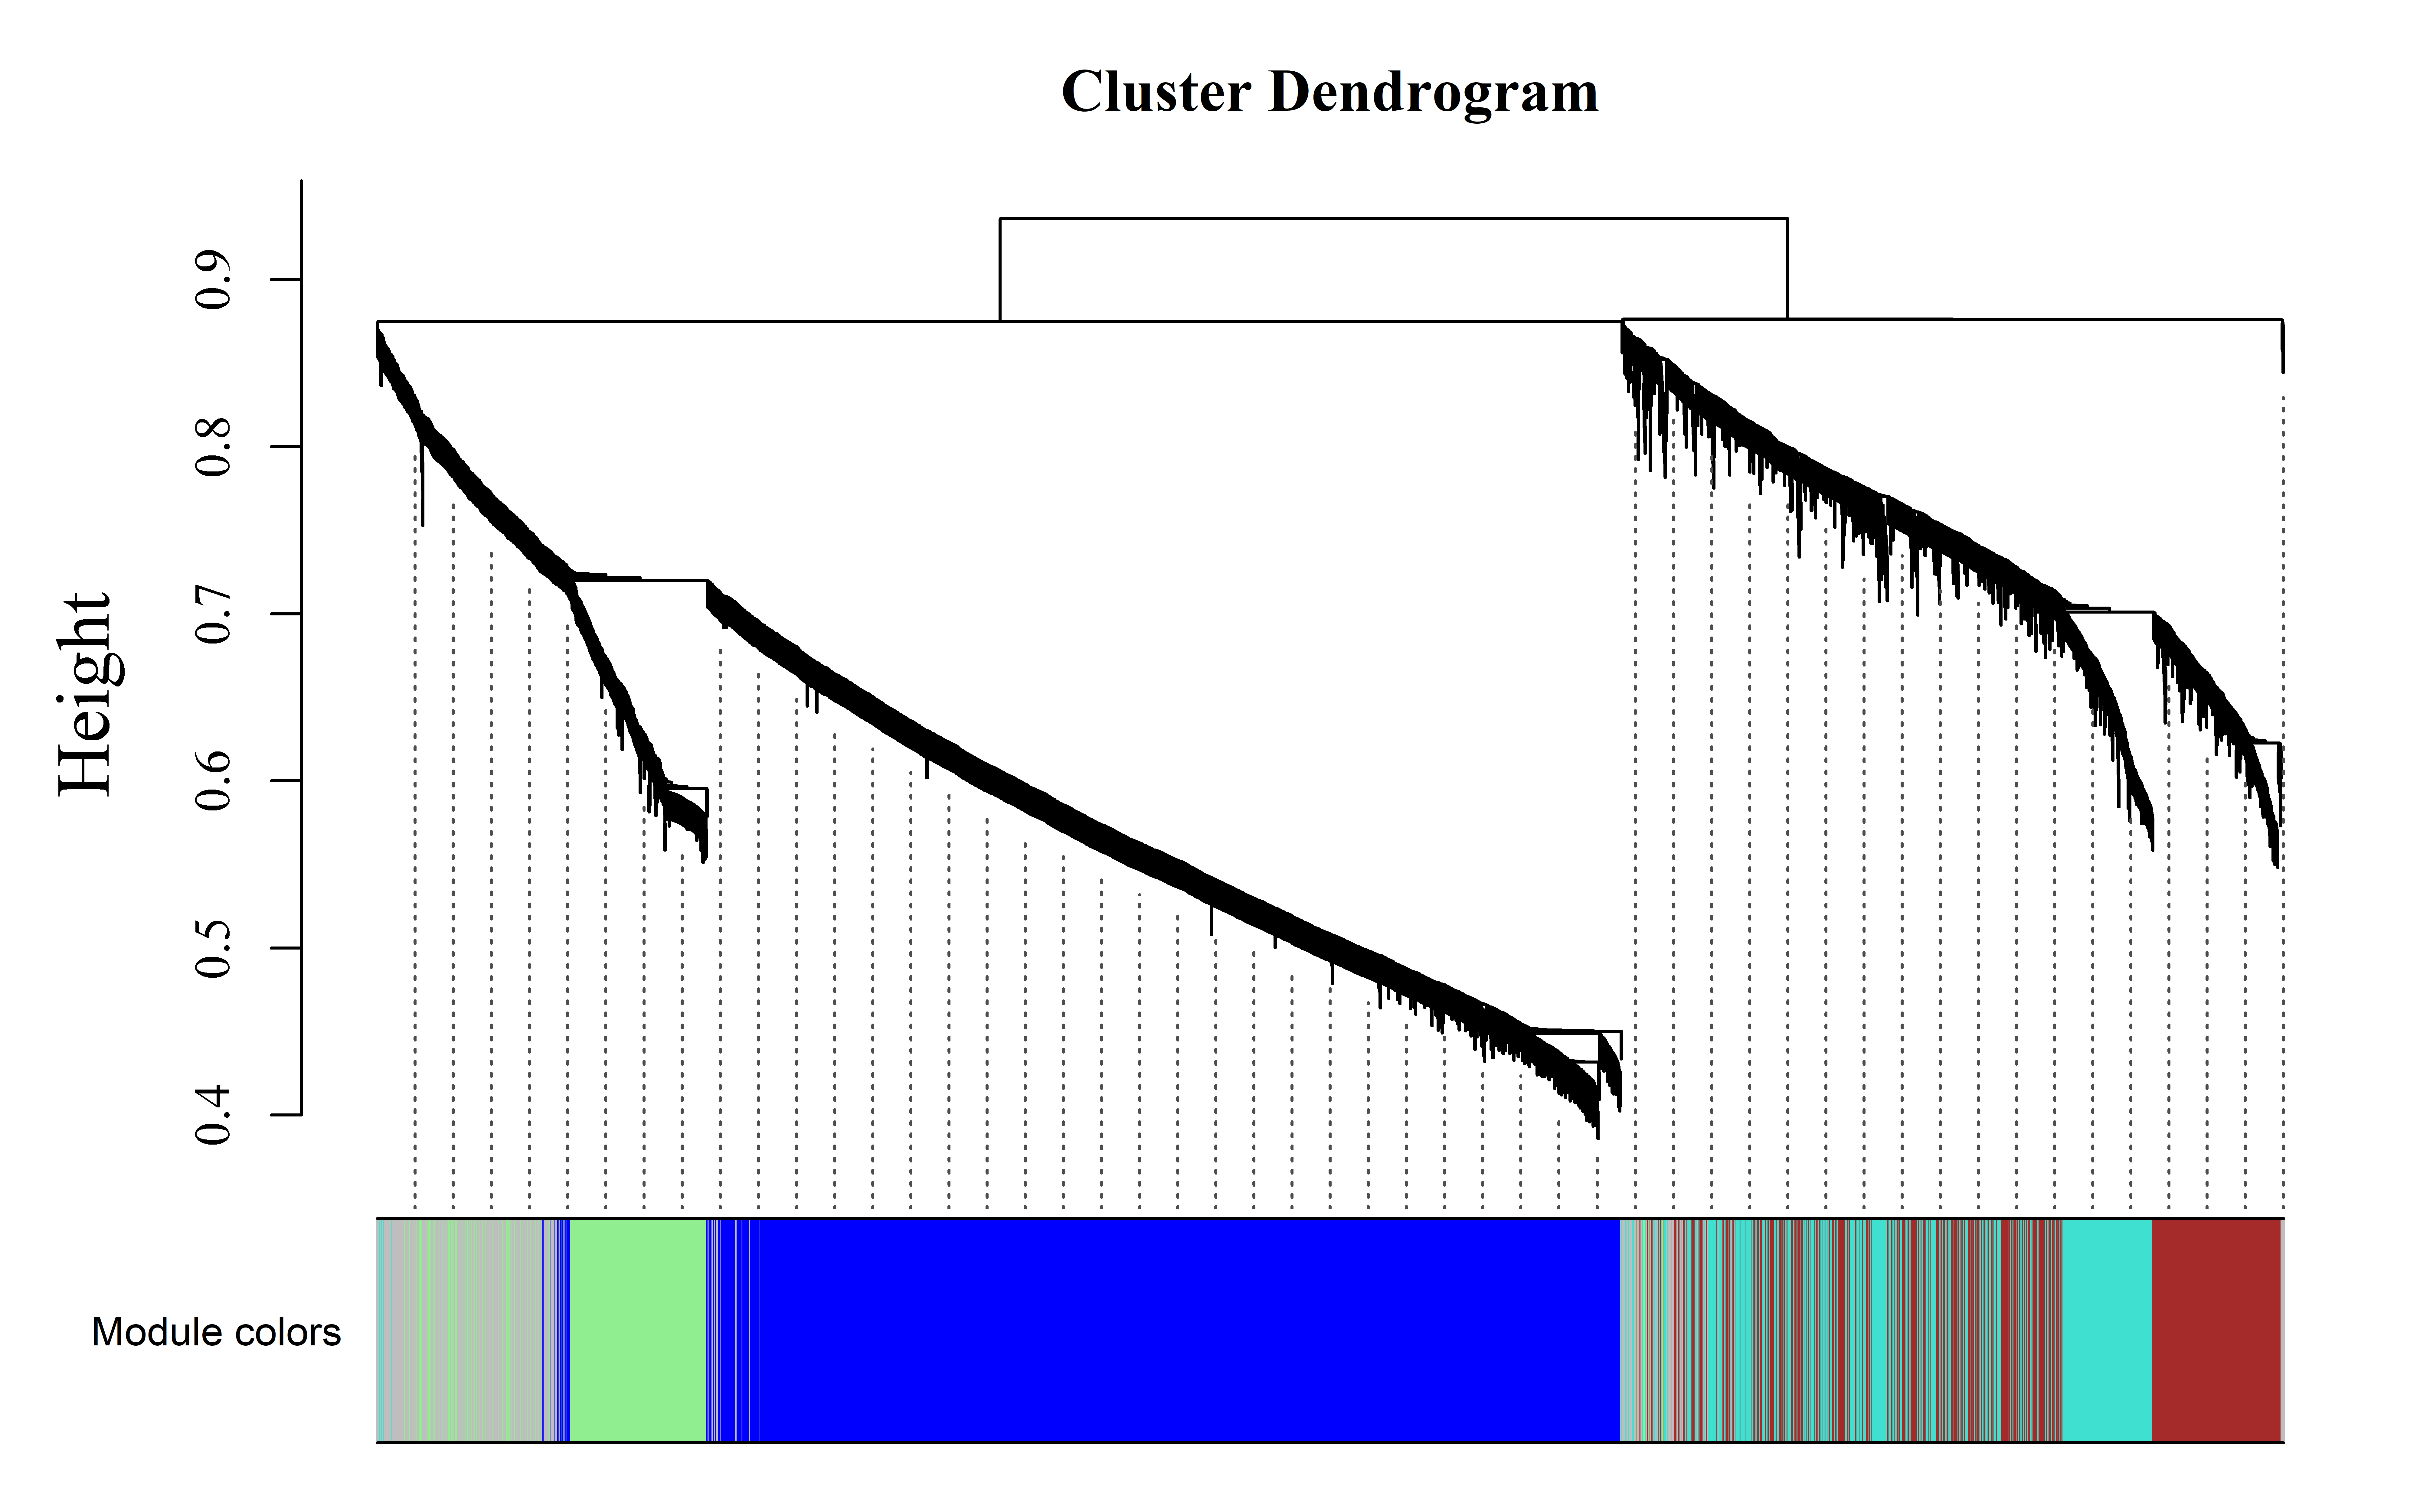


**Figure S5. Dendrogram, created through dissimilarity clustering, displays various modules in different colors.**


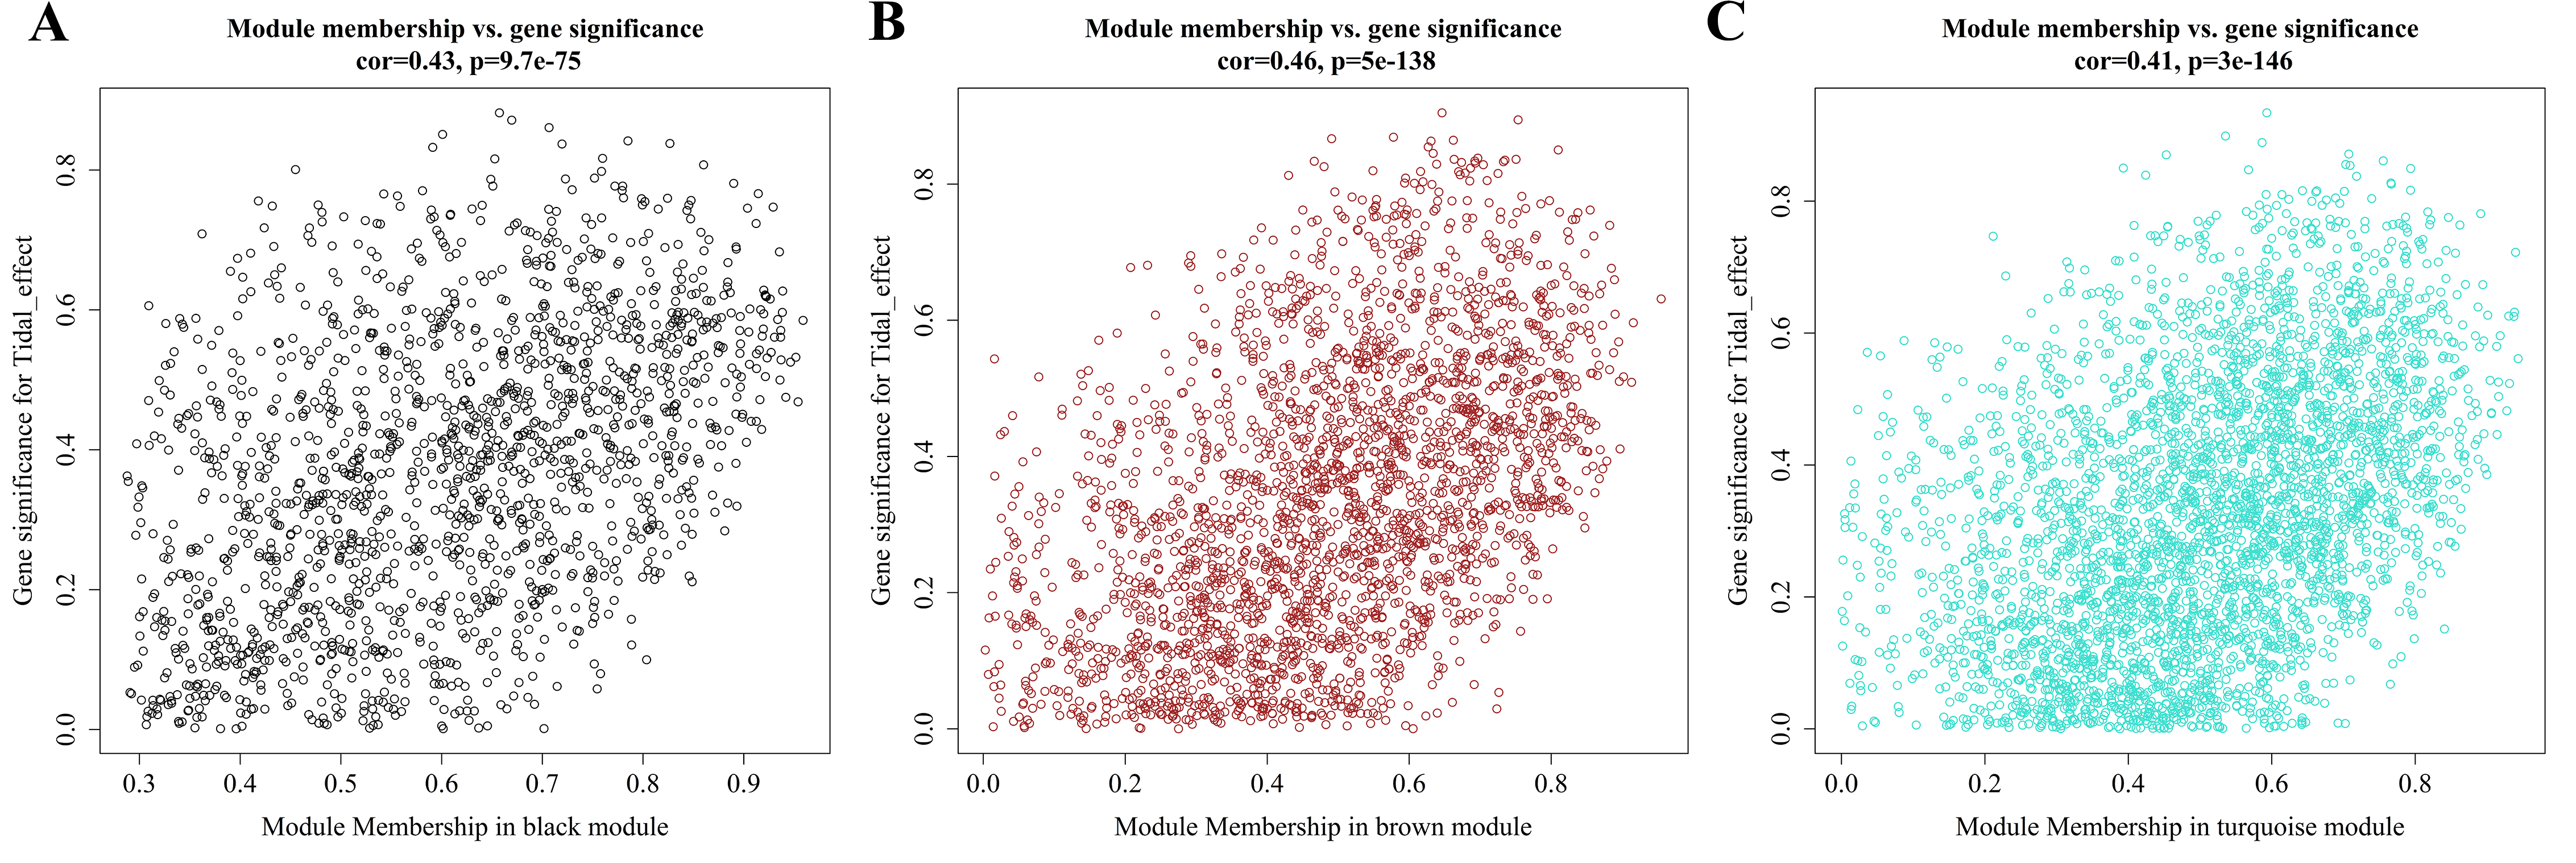


**Figure S6. Scatter plots depicting gene significance and module membership in the (A) black, (B) brown, and (C) turquoise modules.** One dot represents one gene. Cro: correlation.


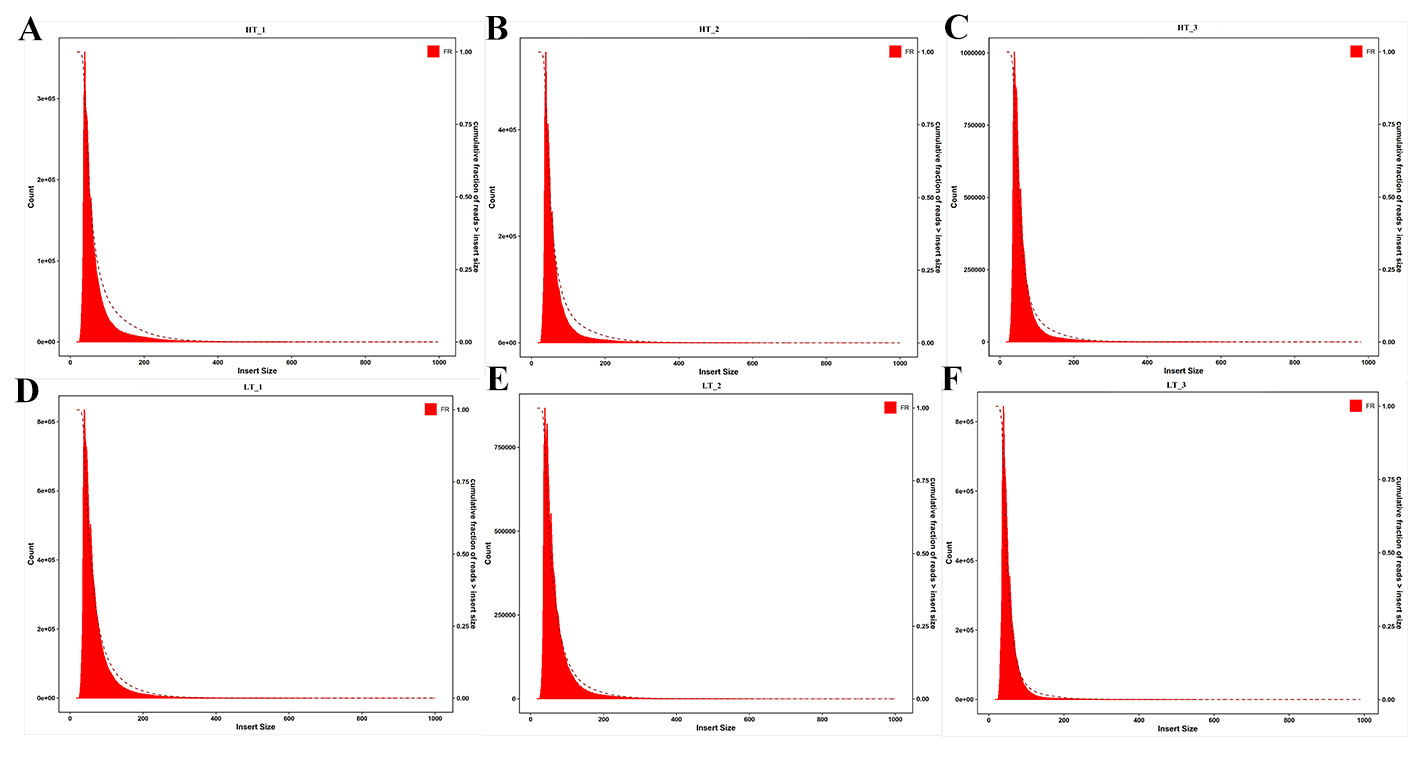


**Figure S7. Insert size histogram of all reads from samples at (A, B and C) high and (D, E and F) low tidal levels.**


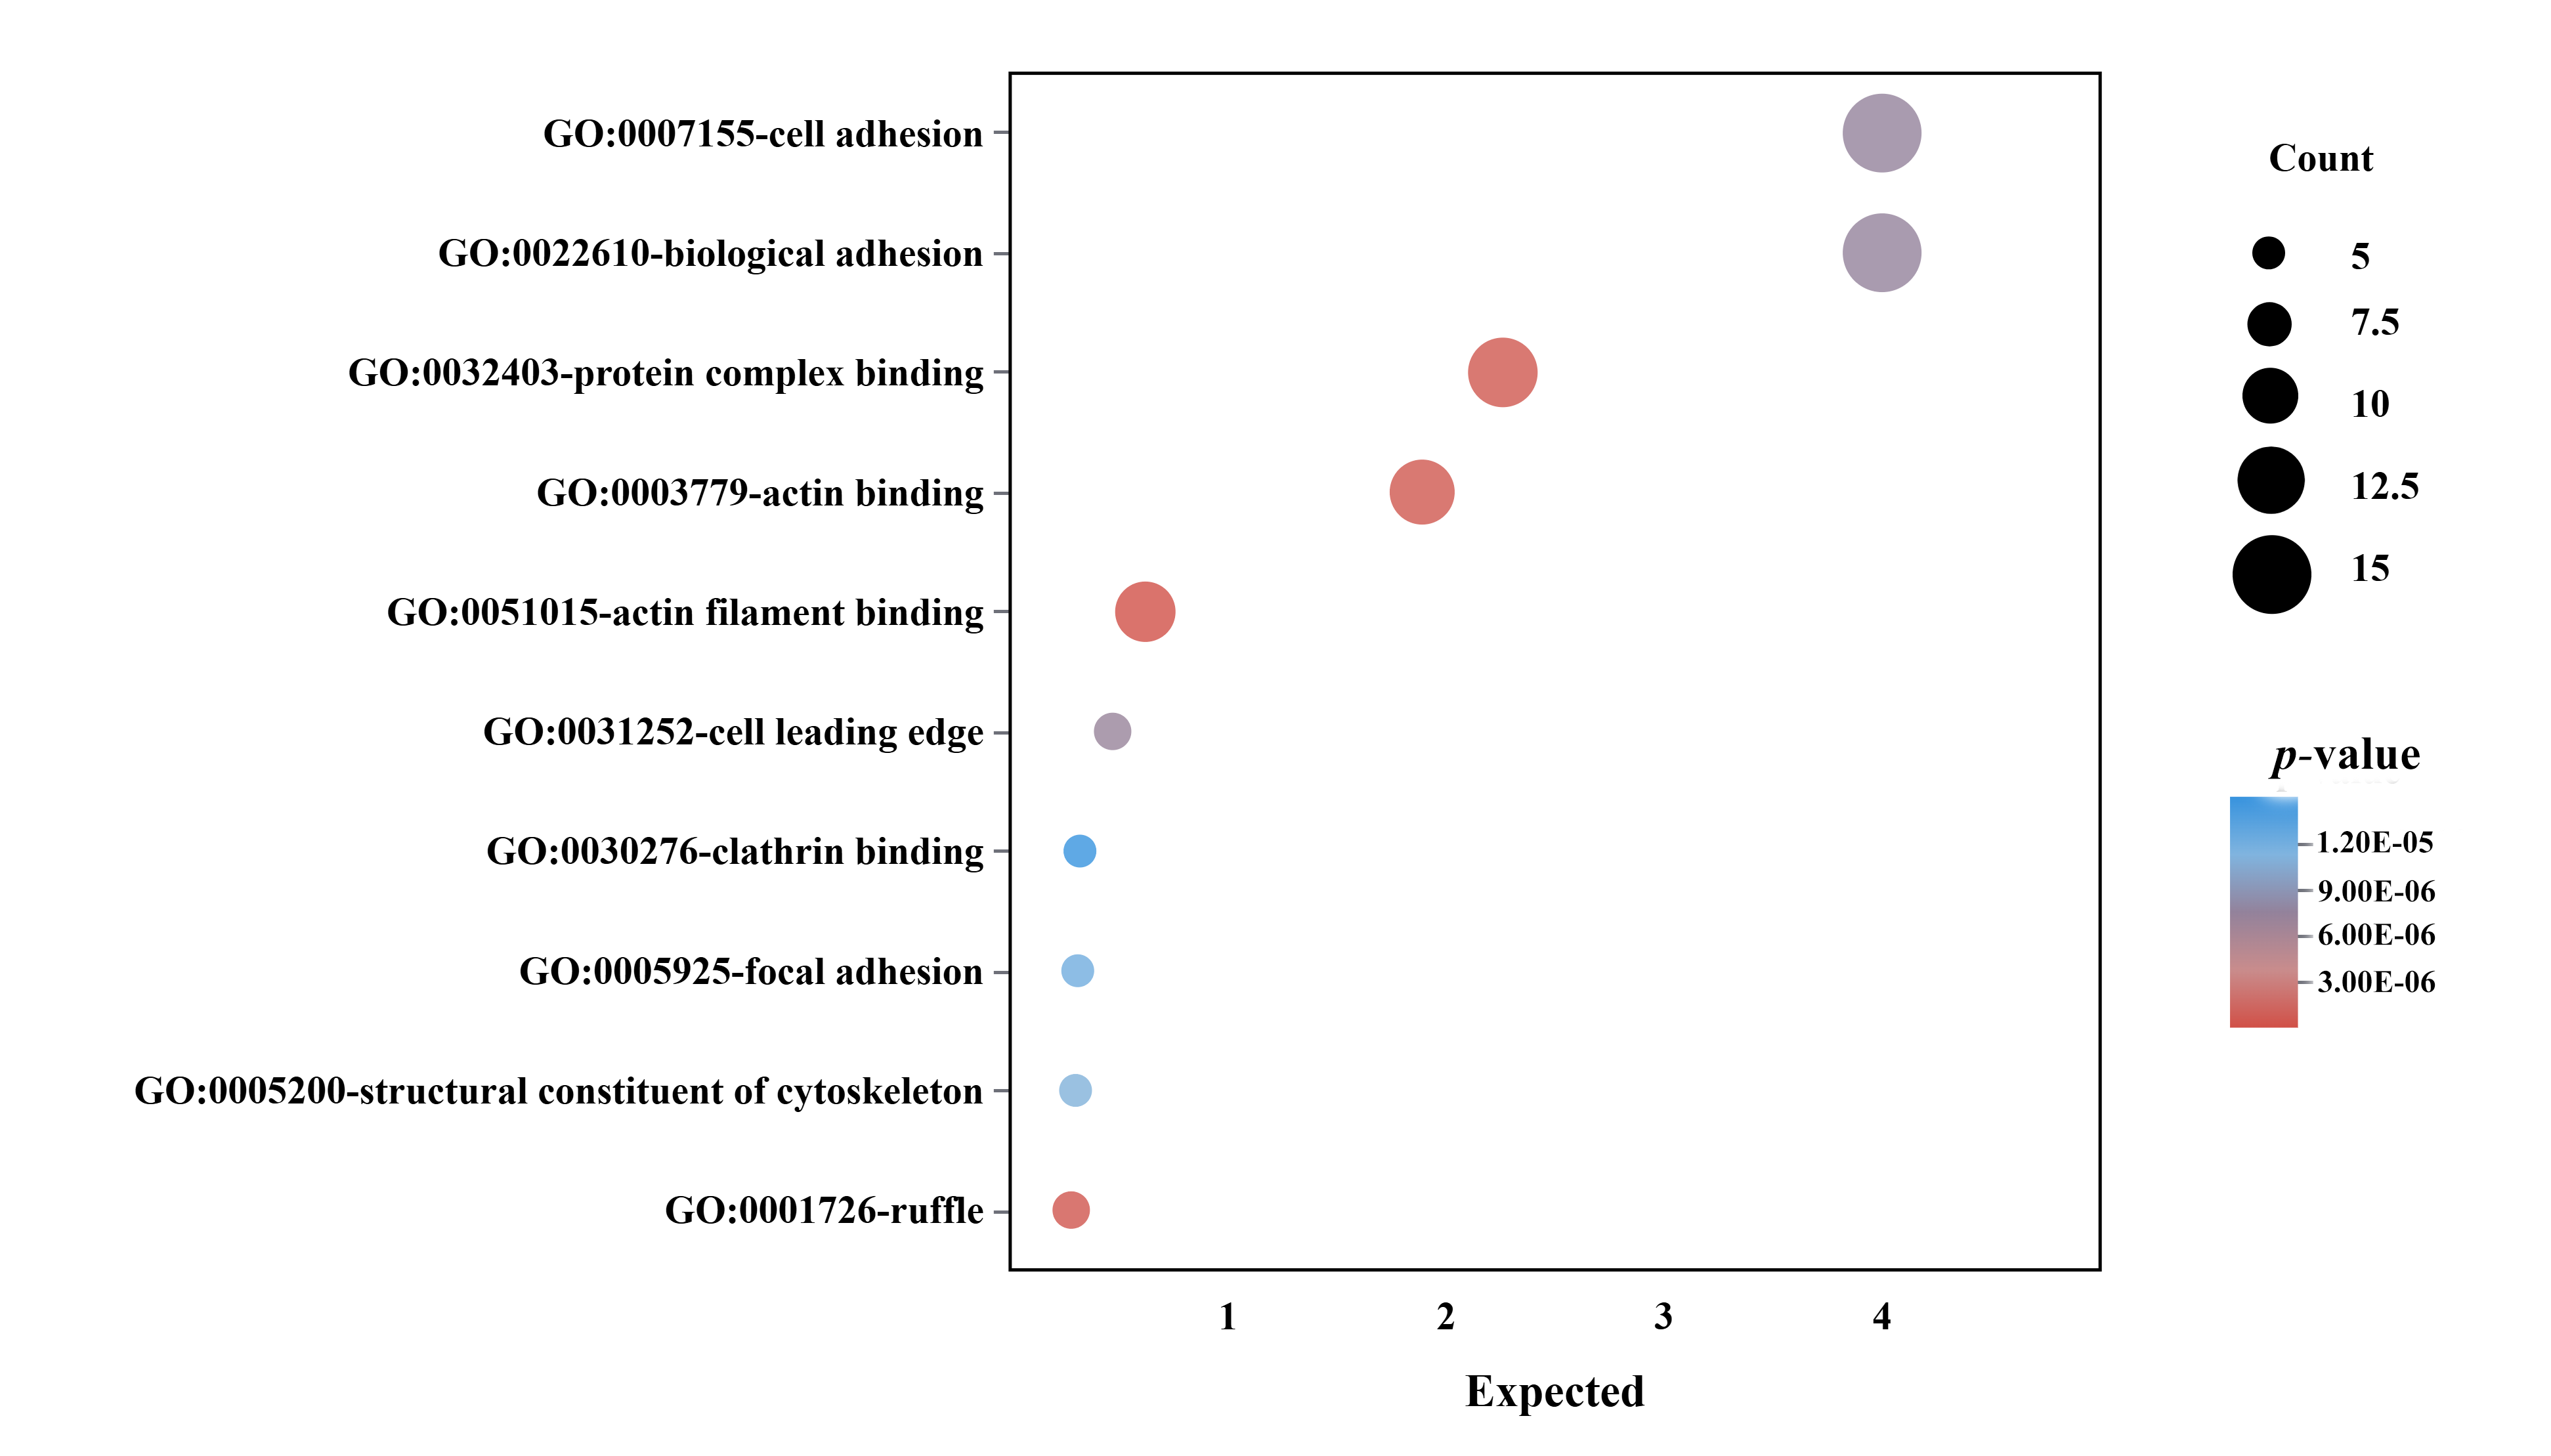


**Figure S8. Functional enrichment analysis of genes associated with differentially accessible chromatin peaks.** Color corresponds to *p*-value. Size represents for genes counts.





**Figure S9. Relative expression levels of *BORIS* and *MYB73* in RNAi experiments.** Relative expression levels of the (A)*BORIS* and (B) *MYB73* in mantle tissues of oysters injected with siRNA “*BORIS*-2071” and “*MYB73*-246” at 12h, 24h, 48h, and 72h. Relative expression levels of (C) *BORIS* and (D) *MYB73* in the formal experiments when injected with siRNA or NC strands at 24h. The values with different letters are representative of significant differences. Error bars indicate standard deviation. * *p* < 0.05, *** *p* < 0.001. NC: negative control.





**Figure S10. The survival of oyster during heat-lethal experiments following (A) *BORIS*-2071 and (B) *MYB73*-246 -siRNA interference, respectively.** The curves in different colors represent the survival rate changes of oysters injected with NC or siRNA under 37 ℃, respectively. * *p* < 0.05, ** *p* < 0.01. NC: negative control.





**Figure S11. Seawater temperature, oxygen, pH and salinity in the DaShentang Reserve.** The values with different letters are representative of significant differences. Error bars indicate standard deviation.
